# Supplementary material for: Robust interaction of ZnO and TiO2 nanoparticles with layered graphitic carbon nitride for enhanced photocatalytic oxidative desulfurization of fuel oil: mechanism, performance and stability
Source: Royal Society of Chemistry journal article supplement (doi:10.1039/d4ra04357j), 2024-01-01
Supplement: d4ra04357j1.pdf [file d4ra04357j1.pdf]

## **Robust Interaction of ZnO and TiO<sub>2</sub> Nanoparticles with Layered Graphitic Carbon Nitride for Enhanced Photocatalytic Oxidative Desulfurization of Fuel Oil: Mechanism, Performance and Stability**

Manh B. Nguyen<sup>a,b\*#</sup>, Pham Thi Lan<sup>c#</sup>, Xuan Nui Pham<sup>d</sup>, Thi Hai Yen Pham<sup>a</sup>, Nguyen Ngoc Ha<sup>e</sup>,  
Nguyen Thi Thu Ha<sup>e</sup>, T.-Thanh-Bao Nguyen<sup>f</sup>, Huan V. Doan<sup>d,g\*</sup>, Nguyen Tuan Anh<sup>d</sup>, Tran Dai  
Lam<sup>d\*</sup>

<sup>a</sup>*Institute of Chemistry, Vietnam Academy of Science and Technology, 18 Hoang Quoc Viet, Cau  
Giay, Hanoi, Viet Nam*

<sup>b</sup>*Graduate University of Science and Technology, Vietnam Academy of Science and Technology,  
18 Hoang Quoc Viet, Cau Giay, Hanoi, Viet Nam*

<sup>c</sup>*Institute for Tropical Technology, Vietnam Academy of Science and Technology, 18 Hoang  
Quoc Viet, Cau Giay, Hanoi, Viet Nam*

<sup>d</sup>*Hanoi University of Mining and Geology, 18 Pho Vien, Duc Thang, Bac Tu Liem, Hanoi, Viet  
Nam*

<sup>e</sup>*Hanoi National University of Education, 136 Xuan Thuy, Cau Giay, Hanoi, Viet Nam*

<sup>f</sup>*Institute of Physics, Vietnam Academy of Science and Technology, 18 Hoang Quoc Viet, Cau  
Giay, Hanoi, Viet Nam*

<sup>g</sup>*Research School of Chemistry, The Australian National University, ACT 2601, Canberra,  
Australia*

*#: these authors have contributed equally to this work*

Corresponding authors: trandailam@gmail.com (Tran Dai Lam), nguyenbamanh@ich.vast.vn  
(Manh B. Nguyen) and huan.doan@anu.edu.au (Huan V. Doan)

### **1. Chemical**

Titanium isopropoxide (TIP, 97%, Sigma-Aldrich), Zinc chloride hexahydrate (ZnCl<sub>2</sub>.6H<sub>2</sub>O, 98%,  
Sigma-Aldrich), Dibenzothiophene (C<sub>12</sub>H<sub>8</sub>S, 98%, Sigma-Aldrich), benzoquinone (p-BQ, 99%,

Sigma-Aldrich), tert-butanol (TBA, 99%, Sigma-Aldrich), potassium dichromate ( $K_2Cr_2O_7$ , 99%, Sigma-Aldrich), acetonitrile (99%, China), acetic acid ( $CH_3COOH$ , 98%, China), n-octane (98%, China), ethanol ( $C_2H_5OH$ , 98%, China), Hydrogen peroxide ( $H_2O_2$ , 30% in  $H_2O$ , China), Ammonium chloride ( $NH_4Cl$ , 98%, China).

## 2. Characterization techniques

Phase structure, surface valence state, elemental composition, specific surface area, morphology and optical properties of ZnO,  $TiO_2$ , OCN and 20%ZnO- $TiO_2$ /OCN material samples analyzed by X-ray diffraction (XRD, D8 ADVANCE, Bruker, Germany), X-ray photoelectron spectroscopy (XPS, Thermo VG Multilab 2000), Energy Dispersive X-ray Spectroscopy (EDS, JED-2300), transmission electron microscopy (TEM, Leica IEO 906E), photoluminescence (PL, Varian), Mott-Schottky (MS, Biologic SP 300), electrochemical impedance spectroscopy (EIS, AUTOLAB, Metrohm, Netherland), gas chromatography–mass spectrometry (GC-MS, ISQ 7000 GC-MS system by Thermo Scientific), and UV-Vis diffuse reflectance spectra (UV-Vis DRS, UV-2600, Shimadzu) methods.

The product of the oxidative desulfurization process is determined on the ISQ 7000 GC-MS system by Thermo Scientific. The system includes Trace 1310 gas chromatography, ISO 7000 ExtractaBrite ion source mass spectrometer, Lumin gas purifier and trap, CombiPAL CTC Analytics AG automatic sample injector with headspace sampling, and TraceGOLD TG-5MS chromatography column by Thermo Scientific: column height 30 m, inner diameter 0.25 mm, stationary phase thickness 0.25  $\mu m$ .

First, 1 mL of the sample is placed in a 1.8 mL vial and heated to 250 °C. The gas chromatography column is heated to 50 °C for 1 minute; then heated from 50 °C to 100 °C and held for 2 minutes; then heated to 270 °C and held for 20 minutes, and finally heated to 300 °C. The gas chromatography column heating process is performed at a rate of 50 °C/minute. Then, helium gas is used at a rate of 1 mL/minute to transfer the product from the GC to the open MS at 280 °C. The ion source temperature is 250 °C, and the ionization mode is electron impact (EI). The product of the oxidative desulfurization process is processed using the Chromeleon™ chromatography data system (CDS) software.

### 3. Additional information and results

Table S1. The content of ZnCl<sub>2</sub>.6H<sub>2</sub>O and titanium isopropoxide used in the synthesis of ZnO-TiO<sub>2</sub>/OCN samples

| Samples                      | OCN<br>(g) | Titanium(IV)<br>Isopropoxide (mL) | ZnCl <sub>2</sub> .6H <sub>2</sub> O<br>(g) |
|------------------------------|------------|-----------------------------------|---------------------------------------------|
| 10%ZnO-TiO <sub>2</sub> /OCN | 0.5        | 1.52                              | 0.30                                        |
| 20%ZnO-TiO <sub>2</sub> /OCN | 0.5        | 1.14                              | 0.60                                        |
| 30%ZnO-TiO <sub>2</sub> /OCN | 0.5        | 0.76                              | 0.91                                        |

Table S2. Binding energies of the bonds in the ZnO, TiO<sub>2</sub>, OCN and 20%ZnO-TiO<sub>2</sub>/OCN samples

|      |                      | ZnO     | TiO <sub>2</sub> | OCN    | 20%ZnO-TiO <sub>2</sub> /OCN | 20%ZnO-TiO <sub>2</sub> /OCN<br>after 5 cycles |
|------|----------------------|---------|------------------|--------|------------------------------|------------------------------------------------|
| Zn2p | Zn 2p <sub>1/2</sub> | 1022.60 | -                | -      | 1022.72                      | 1022.81                                        |
|      | Zn 2p <sub>3/2</sub> | 1045.75 | -                | -      | 1045.81                      | 1022.83                                        |
| Ti2p | Ti <sup>3+</sup>     | -       | -                | -      | 457.47                       | 458.64                                         |
|      |                      | -       | -                | -      | 462.96                       | 463.17                                         |
|      | Ti <sup>4+</sup>     | -       | 458.52           | -      | 458.79                       | 459.72                                         |
|      |                      | -       | 464.17           | -      | 464.46                       | 465.53                                         |
|      | Ti-N                 | -       | -                | -      | 460.28                       | 461.36                                         |
|      |                      | -       | -                | -      | 465.91                       | 466.77                                         |
| C1s  | sp <sup>2</sup> C-C  | -       | -                | 284.87 | 284.73                       | 284.85                                         |
|      | C-O                  | -       | -                | 287.80 | 287.51                       | 287.59                                         |
|      | N-C=N                | -       | -                | 288.53 | 288.03                       | 288.37                                         |
|      | Ti- N                | -       | -                | -      | 396.63                       | 396.81                                         |

|       |                    |        |        |        |        |        |
|-------|--------------------|--------|--------|--------|--------|--------|
| N1s   | C–N=C              | -      | -      | 398.77 | 398.59 | 398.80 |
|       | sp <sup>3</sup> N  | -      | -      | 400.41 | 399.92 | 400.00 |
|       | C <sub>2</sub> –NH | -      | -      | 401.74 | 401.31 | 401.43 |
| <hr/> |                    |        |        |        |        |        |
|       | N–C–O              | -      | -      | 530.64 | 530.48 | 530.99 |
| O1s   | Ti-O or Zn-O       | 532.09 | 532.00 | -      | 532.29 | 532.77 |
|       | –OH groups         | 533.91 | 533.88 | 533.93 | 533.97 | 534.55 |

Table S3. Element composition (wt%) of OCN and ZnO-TiO<sub>2</sub>/OCN samples

| Samples                      | C     | N     | O     | Ti    | Zn    | Total |
|------------------------------|-------|-------|-------|-------|-------|-------|
| OCN                          | 43.60 | 51.66 | 4.74  | -     | -     | 100   |
| 10%ZnO-TiO <sub>2</sub> /OCN | 22.04 | 26.12 | 20.34 | 23.63 | 7.87  | 100   |
| 20%ZnO-TiO <sub>2</sub> /OCN | 21.94 | 26.07 | 18.69 | 16.94 | 16.36 | 100   |
| 30%ZnO-TiO <sub>2</sub> /OCN | 21.92 | 26.47 | 15.18 | 12.9  | 23.53 | 100   |

Table S4. The benchmark of the as-synthesized 20%ZnO-TiO<sub>2</sub>/OCN sample

| Materials                                                       | Reaction conditions                                                              | Light source                           | Photocatalytic performance | Ref. |
|-----------------------------------------------------------------|----------------------------------------------------------------------------------|----------------------------------------|----------------------------|------|
| ZnO/FSM-16                                                      | [DBT] = 200 mg L <sup>-1</sup><br>m <sub>catalyst</sub> = 0.3 g L <sup>-1</sup>  | Hg lamp (60 W, UV)                     | 95% in 550 min             | [1]  |
| TiO <sub>2</sub> /g-C <sub>3</sub> N <sub>4</sub>               | [DBT] = 500 mg L <sup>-1</sup><br>m <sub>catalyst</sub> = 10.0 g L <sup>-1</sup> | 250 W high-pressure Hg lamp (UV light) | 98.9% in 120 min           | [2]  |
| Ti <sub>3</sub> C <sub>2</sub> /g-C <sub>3</sub> N <sub>4</sub> | [TH] = 140 mg L <sup>-1</sup><br>m <sub>catalyst</sub> = 2.5 g L <sup>-1</sup>   | 300 W xenon lamp                       | 73.6% in 180 min           | [3]  |
| Ag@AgBr/Al-SBA-15                                               | [DBT] = 500 mg L <sup>-1</sup><br>m <sub>catalyst</sub> = 1.0 g L <sup>-1</sup>  | Sunlight irradiation                   | 98.66% in 300 min          | [4]  |
| Ti-SBA-15                                                       | [DBT] = 500 mg L <sup>-1</sup><br>m <sub>catalyst</sub> = 2.5 g L <sup>-1</sup>  | 35 W UV light                          | 92.68% in 360 min          | [5]  |

|                                                                  |                                                                                 |               |       |                      |           |
|------------------------------------------------------------------|---------------------------------------------------------------------------------|---------------|-------|----------------------|-----------|
| Ag <sub>3</sub> PO <sub>4</sub> /d-C <sub>3</sub> N <sub>4</sub> | [DBT] = 200 mg L <sup>-1</sup><br>m <sub>catalyst</sub> = 2.5 g L <sup>-1</sup> | 300 W<br>lamp | xenon | 92.5 % in 180<br>min | [6]       |
| AgCl/PbMoO <sub>4</sub>                                          | [DBT] = 200 mg L <sup>-1</sup><br>m <sub>catalyst</sub> = 1.5 g L <sup>-1</sup> | Not mentioned |       | 97.0% in 120<br>min  | [7]       |
| Ni-WO <sub>3</sub> @g-C <sub>3</sub> N <sub>4</sub>              | [DBT] = 100 mg L <sup>-1</sup><br>m <sub>catalyst</sub> = 2.0 g L <sup>-1</sup> | Not mentioned |       | 97.0% in 180<br>min  | [8]       |
| WO <sub>3</sub> /g-C <sub>3</sub> N <sub>4</sub>                 | [DBT] = 500 mg L <sup>-1</sup><br>m <sub>catalyst</sub> = 2.0 g L <sup>-1</sup> | Not mentioned |       | 91.2% in 180<br>min  | [9]       |
| CeO <sub>2</sub> /ATP/g-C <sub>3</sub> N <sub>4</sub>            | [DBT] = 200 mg L <sup>-1</sup>                                                  | 300 W<br>lamp | xenon | 98 % in 180<br>min   | [10]      |
| ZnO-TiO <sub>2</sub> /OCN                                        | [DBT] = 300 mg L <sup>-1</sup><br>m <sub>catalyst</sub> = 1.5 g L <sup>-1</sup> | 300 W<br>lamp | xenon | 99.19% in 120<br>min | This work |

Table S5. Calculated optical properties of the (TiO<sub>2</sub>)<sub>7</sub>, (ZnO)<sub>6</sub>, (TiO<sub>2</sub>)<sub>7</sub>(ZnO)<sub>6</sub>, OCN and ZnO-TiO<sub>2</sub>/OCN samples

| System        | (TiO <sub>2</sub> ) <sub>7</sub> | (ZnO) <sub>6</sub> | (TiO <sub>2</sub> ) <sub>7</sub> (ZnO) <sub>6</sub> | OCN  | ZnO-TiO <sub>2</sub> /OCN |
|---------------|----------------------------------|--------------------|-----------------------------------------------------|------|---------------------------|
| Bandgap (eV)  | 5.00                             | 4.28               | 3.97                                                | 4.17 | 3.44                      |
| Peak (UV, eV) | 3.89                             | 3.26               | 3.27                                                | 3.66 | 2.83                      |

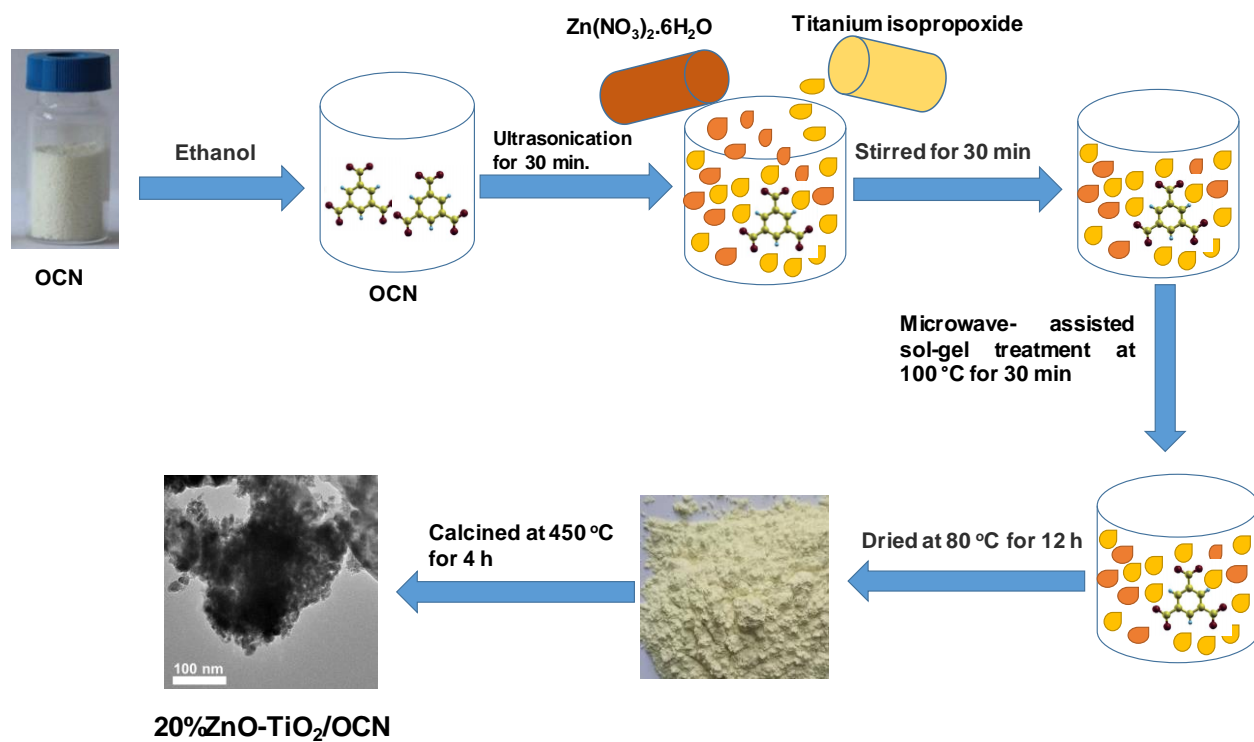

Figure S1. Schematic synthesis of ZnO-TiO<sub>2</sub>/OCN materials by microwave-assisted sol-gel method

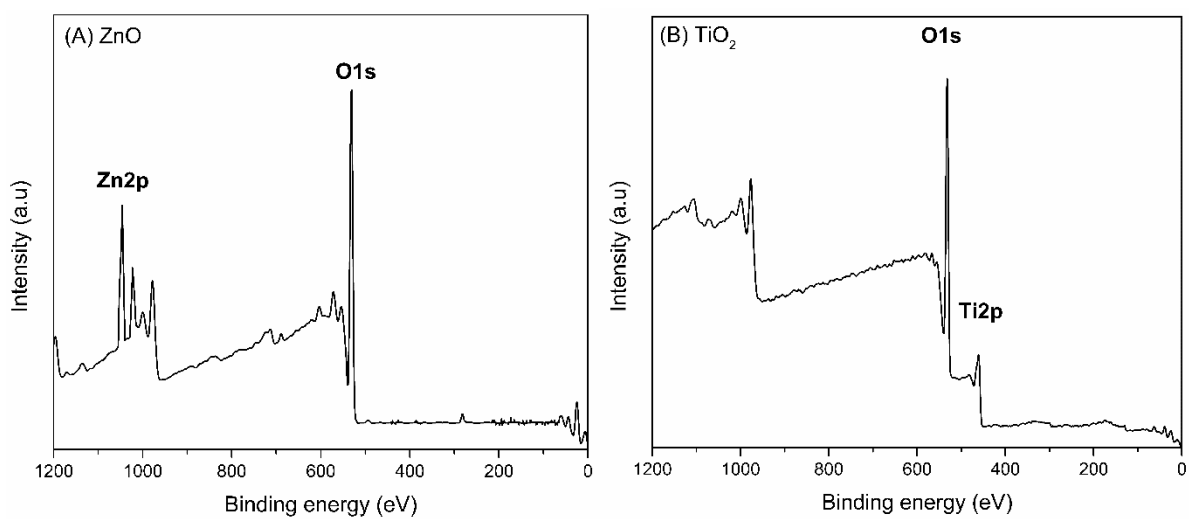

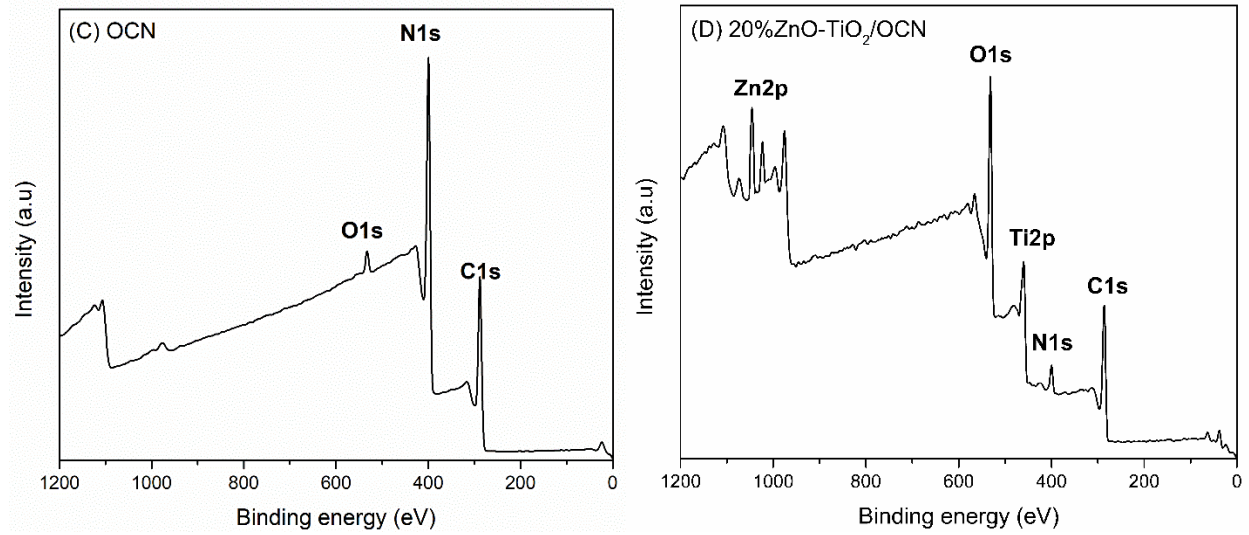

Figure S2. Survey XPS spectra of ZnO (A), TiO<sub>2</sub> (B), OCN (C) and 20%ZnO-TiO<sub>2</sub>/OCN (D) samples

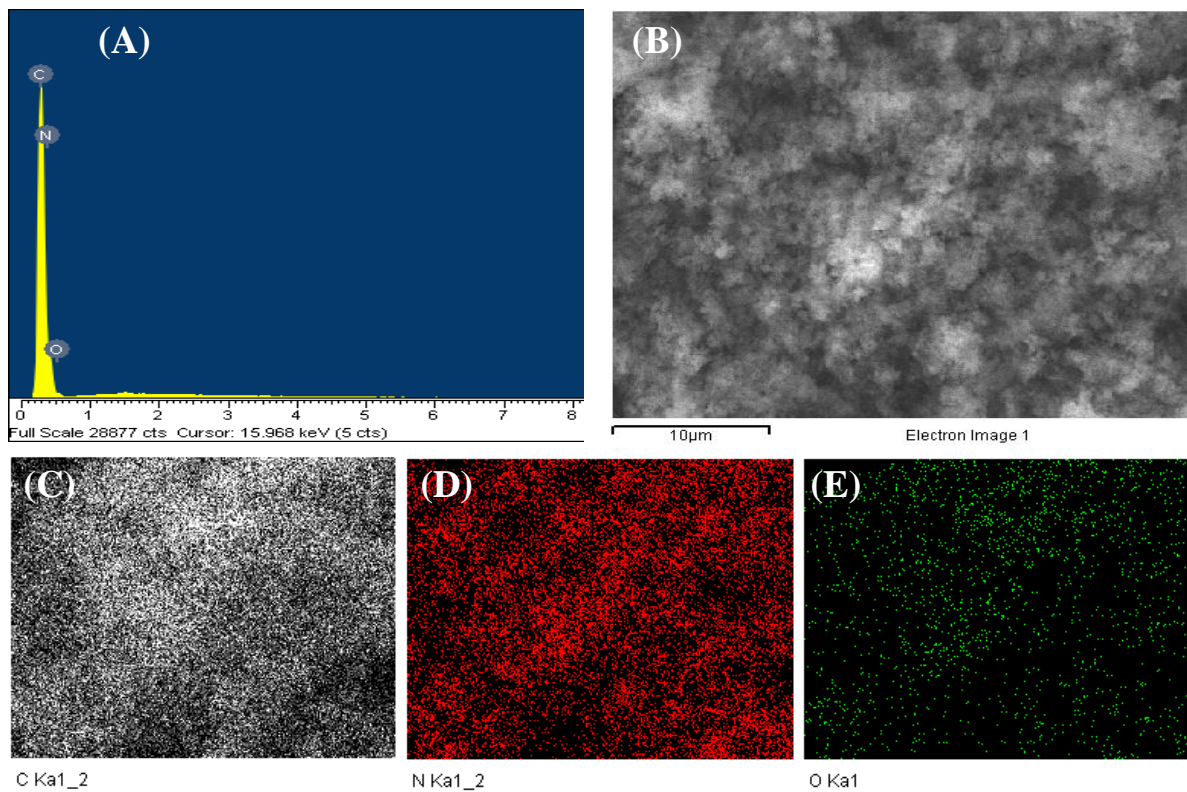

Figure S3. EDS spectrum (A), EDS element layered image (B), EDS element mapping images of C (C), N (D) and O (E) of OCN sample.

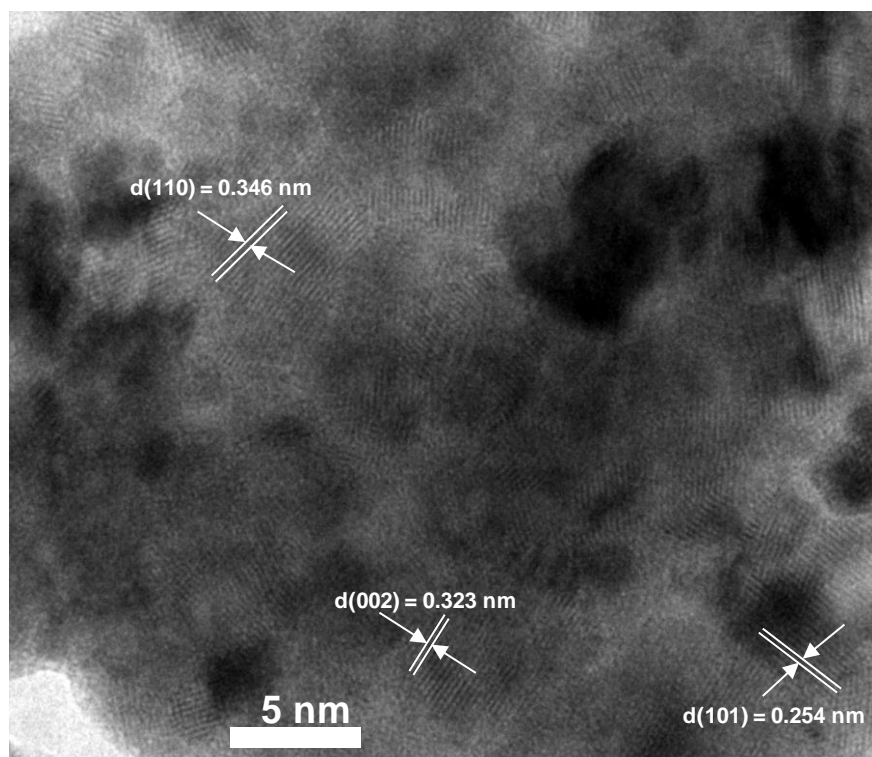

Figure S4. HRTEM image of 20% ZnO-TiO<sub>2</sub>/OCN sample

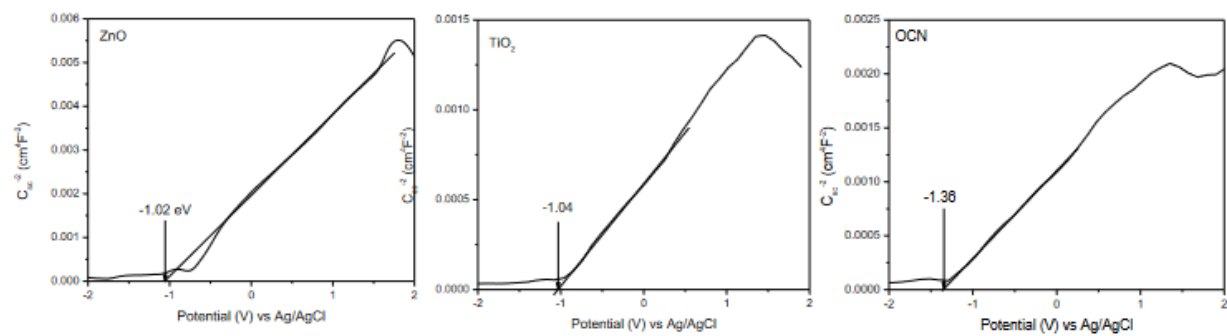

Figure S5. Mott-Schottky (MS) plot of ZnO, TiO<sub>2</sub> and OCN samples



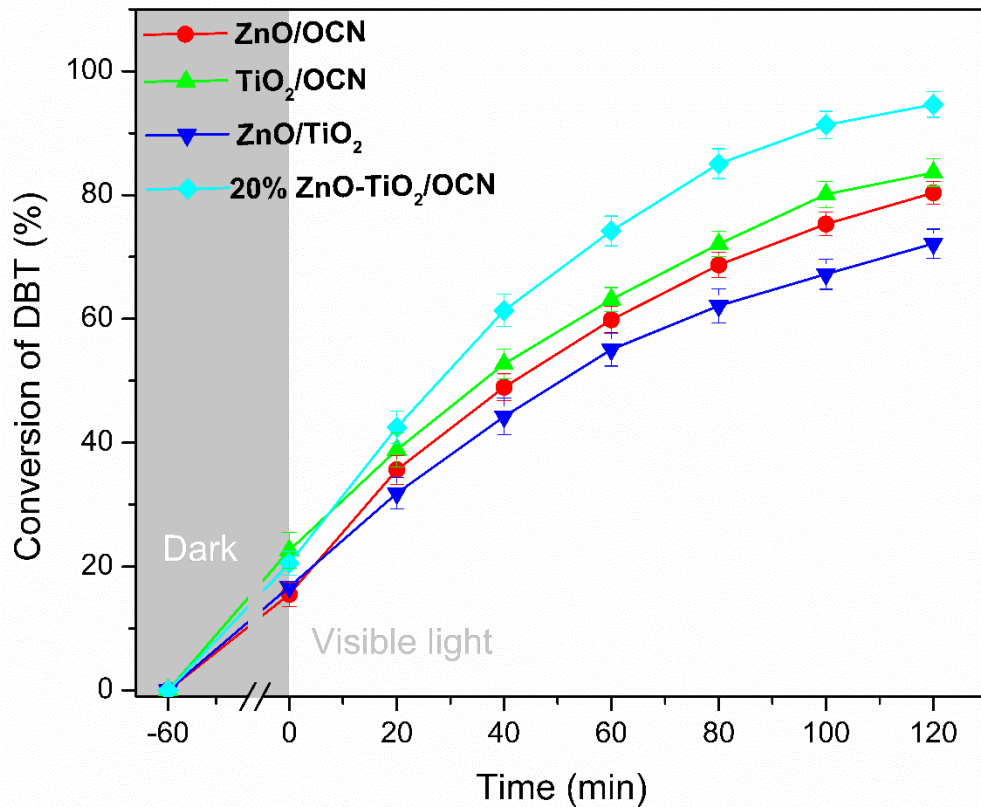

Figure S6. DBT conversion using ZnO/OCN, TiO<sub>2</sub>/OCN, ZnO-TiO<sub>2</sub> and ZnO-TiO<sub>2</sub>/OCN samples

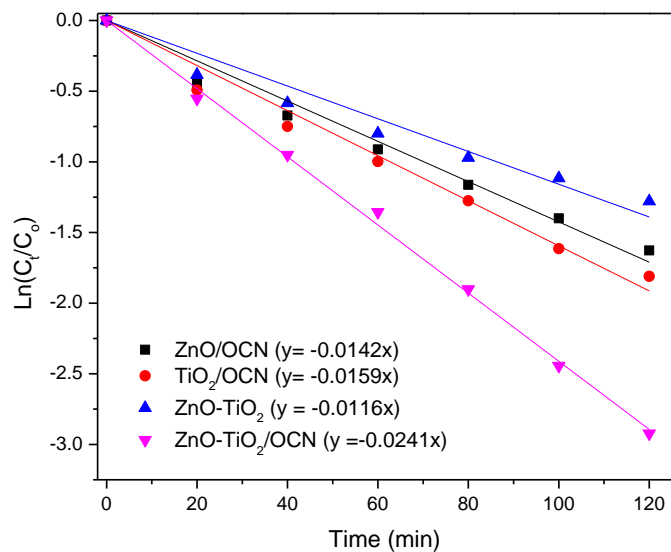

Figure S7. First-order reaction kinetics of ZnO/OCN, TiO<sub>2</sub>/OCN, ZnO-TiO<sub>2</sub>, and ZnO-TiO<sub>2</sub>/OCN samples

RT: 10.00 - 40.00

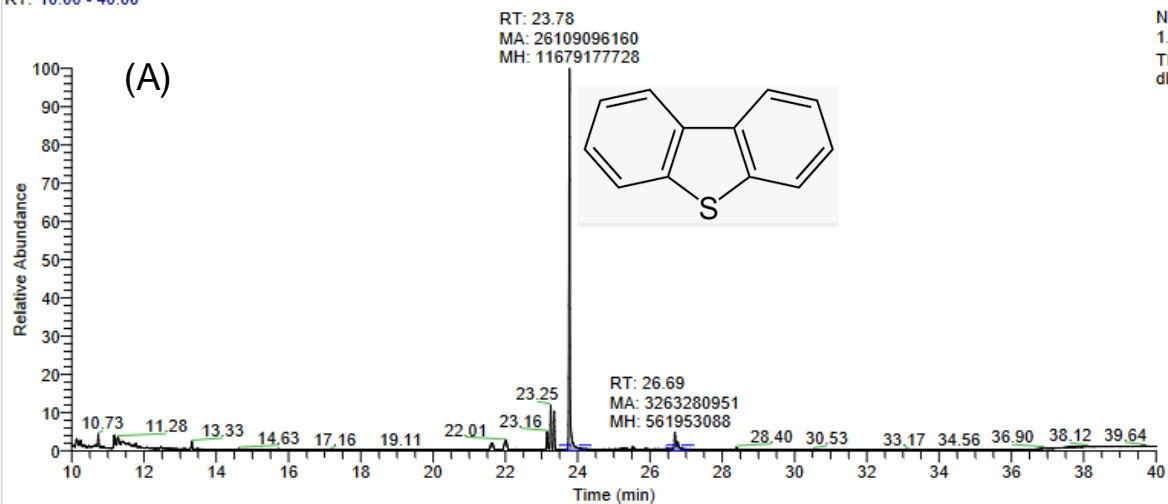

NL:  
1.17E10  
TIC MS  
dbt1

dbt1 #10767 RT: 23.77 AV: 1 NL: 4.63E9  
T: FTMS + c EI Full ms [50.0000-700.0000]

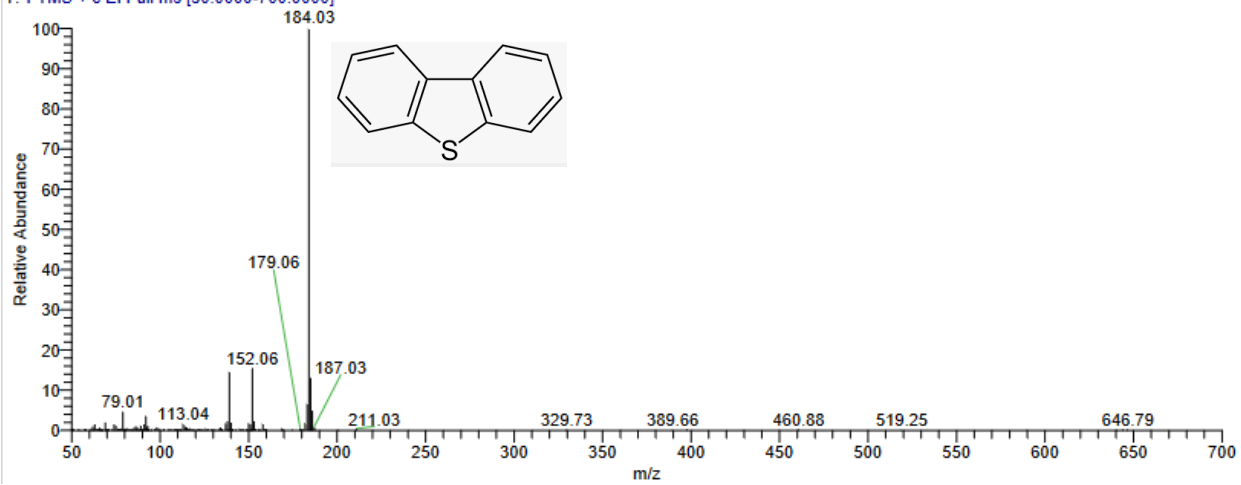

RT: 10.00 - 40.00

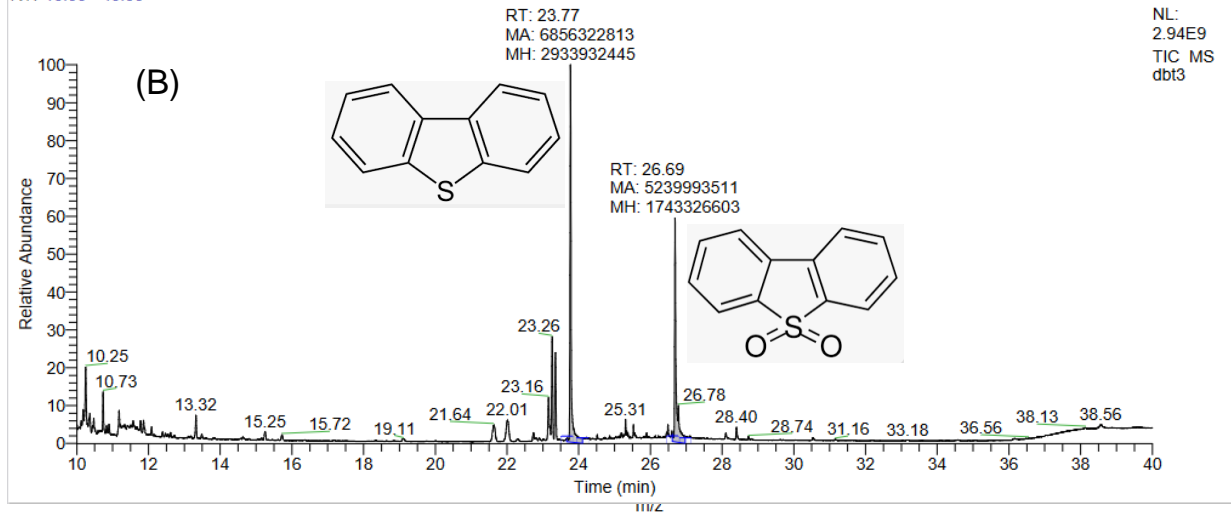

dbt3 #12083 RT: 26.67 AV: 1 NL: 4.85E7  
T: FTMS + c EI Full ms [50.0000-700.0000]

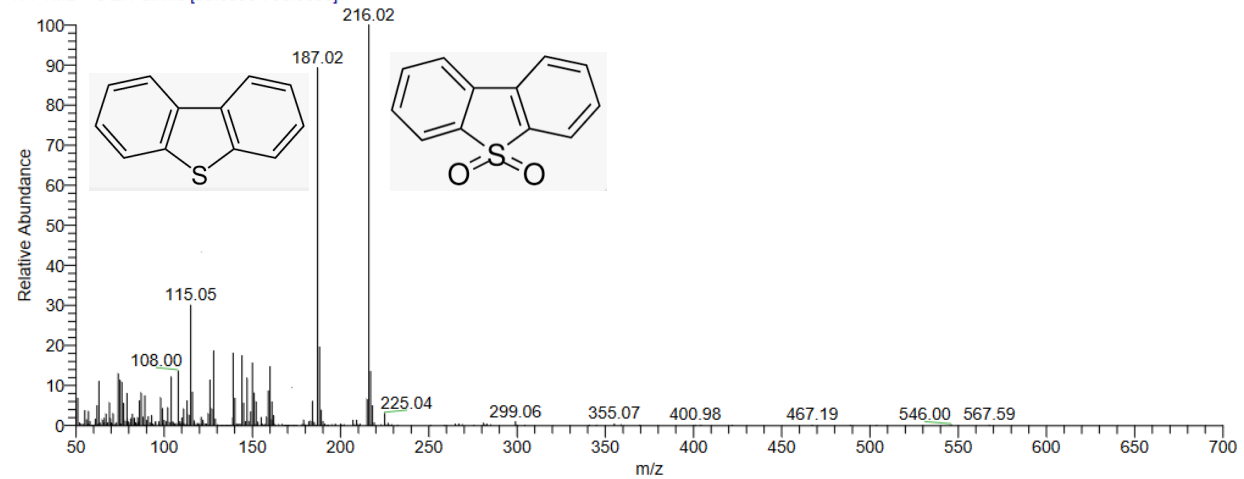

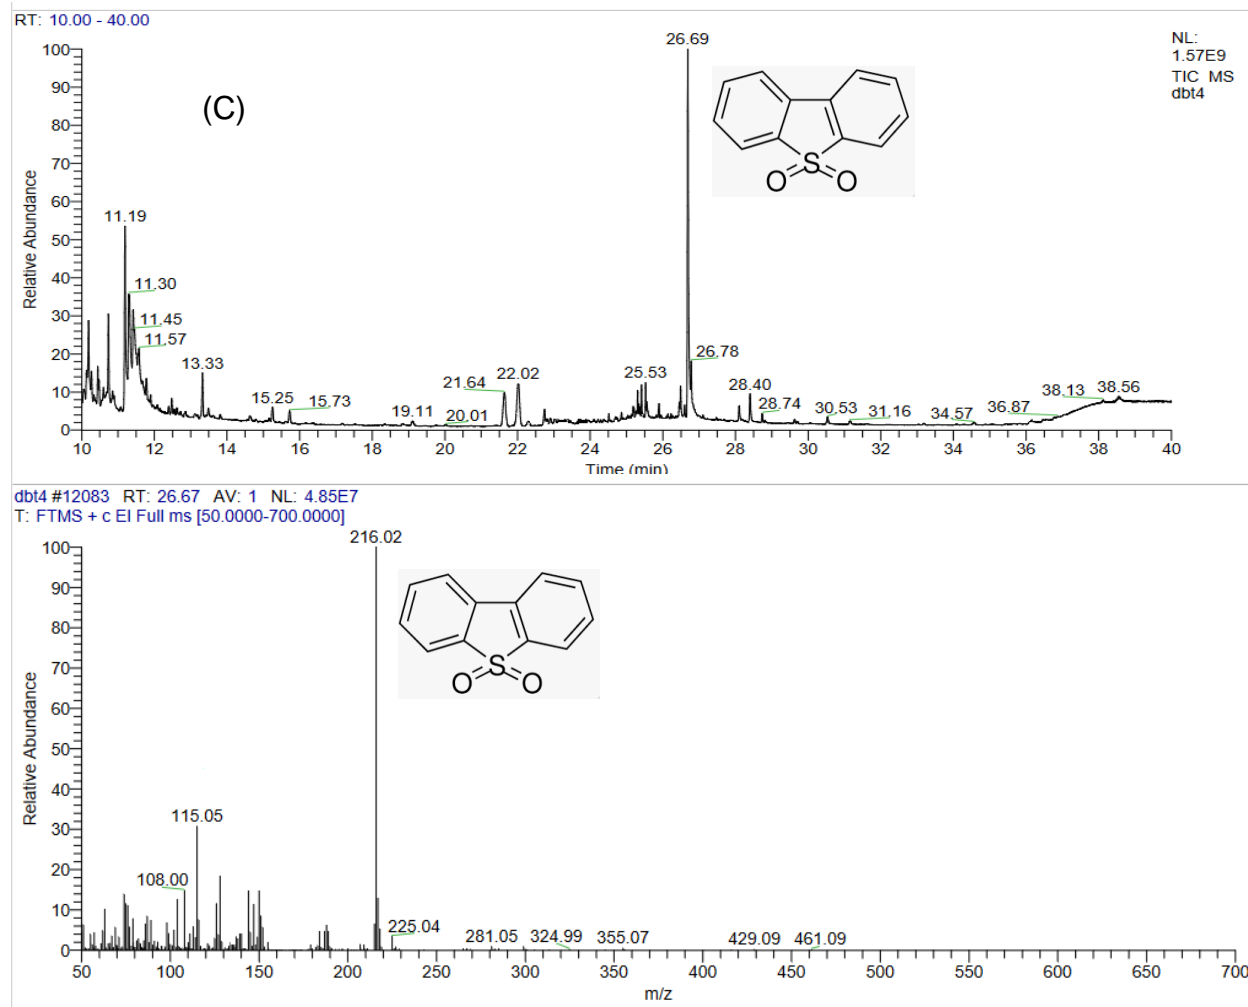

Figure S8. GC-MS of DBT (A) GC-MS spectra of the products in the desulfurization of DBT over 20% ZnO-TiO<sub>2</sub>/OCN photocatalyst after 20 min (B) and 120 min (C)

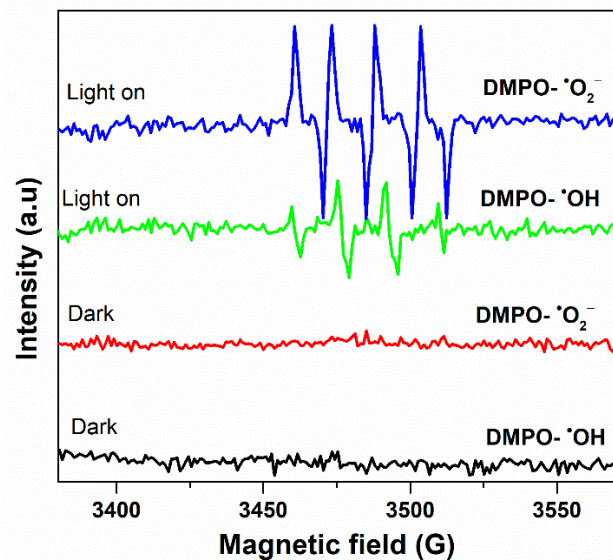

Figure S9. ESR spectra of 20%ZnO-TiO<sub>2</sub>/OCN in the presence DMPO to detect ·OH and ·O<sub>2</sub><sup>-</sup>.

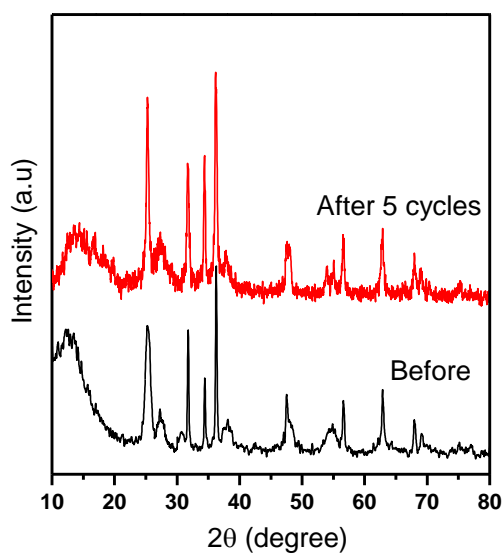

Figure S10. XRD patterns of 20%ZnO-TiO<sub>2</sub>/OCN sample before and after reaction

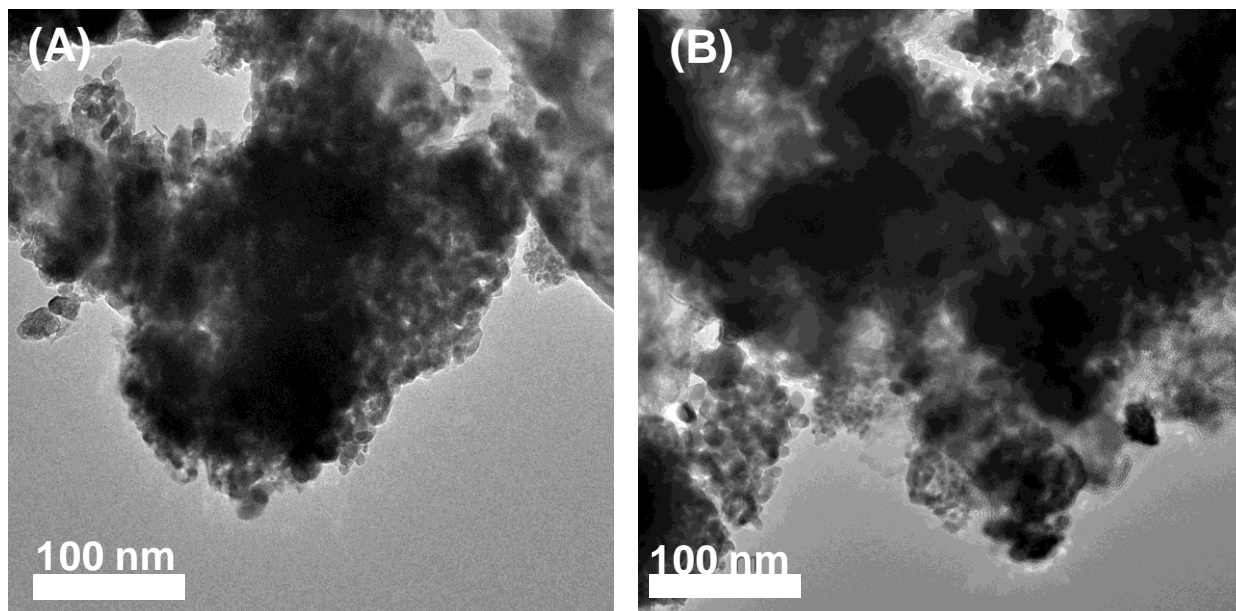

Figure S11. TEM image of 20% ZnO-TiO<sub>2</sub>/OCN sample before and after the reaction.

## References

- 1 A. Hosseini, H. Faghihian and A. M. Sanati, *Materials Science in Semiconductor Processing*, 2018, **87**, 110–118.
- 2 C. Wang, W. Zhu, Y. Xu, H. Xu, M. Zhang, Y. Chao, S. Yin, H. Li and J. Wang, *Ceramics International*, 2014, **40**, 11627–11635.
- 3 X. Zhou, T. Wang, H. liu, L. Zhang, C. Zhang, N. Kong, D. Su and C. Wang, *Journal of Photochemistry and Photobiology A: Chemistry*, 2022, **433**, 114162.
- 4 X. N. Pham, M. B. Nguyen, H. S. Ngo and H. V. Doan, *Journal of Industrial and Engineering Chemistry*, 2020, **90**, 358–370.
- 5 X. N. Pham, M. B. Nguyen and H. V. Doan, *Advanced Powder Technology*, 2020, **31**, 3351–3360.
- 6 H. Chang, H. Yi, Q. Ke and J. Zhang, *ACS Omega*, 2020, **5**, 10927–10938.
- 7 M. Saeed, M. Munir, A. Intisar and A. Waseem, *ACS Omega*, , DOI:10.1021/acsomega.2c00886.
- 8 R. Zhao, X. Li, J. Su and X. Gao, *Applied Surface Science*, 2017, **392**, 810–816.

- 9 X. Li, W. Zhu, X. Lu, S. Zuo, C. Yao and C. Ni, *Chemical Engineering Journal*, 2017, **326**, 87–98.
